# Supplementary material for: Real-world characteristics and use patterns of patients treated with vericiguat: A nationwide longitudinal cohort study in Germany
Source: PubMed Central journal article supplement (PMC11098883; doi:10.1007/s00228-024-03654-0), 2024-03-12

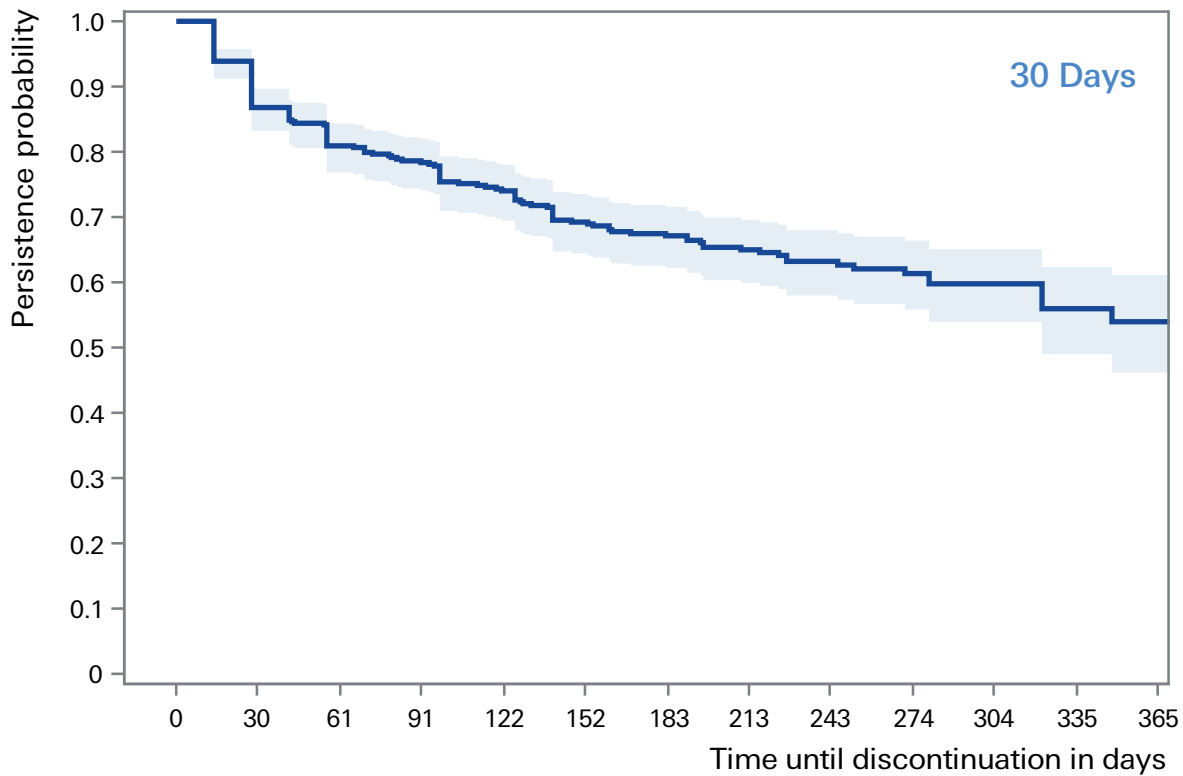

Supplement: 228_2024_3654_MOESM2_ESM.pdf [file 228_2024_3654_MOESM2_ESM.pdf]
